# Supplementary material
Source: HighWire-hosted journal article supplement (https://www.life-science-alliance.org/content/4/2/e201900503/F7)

Sox9

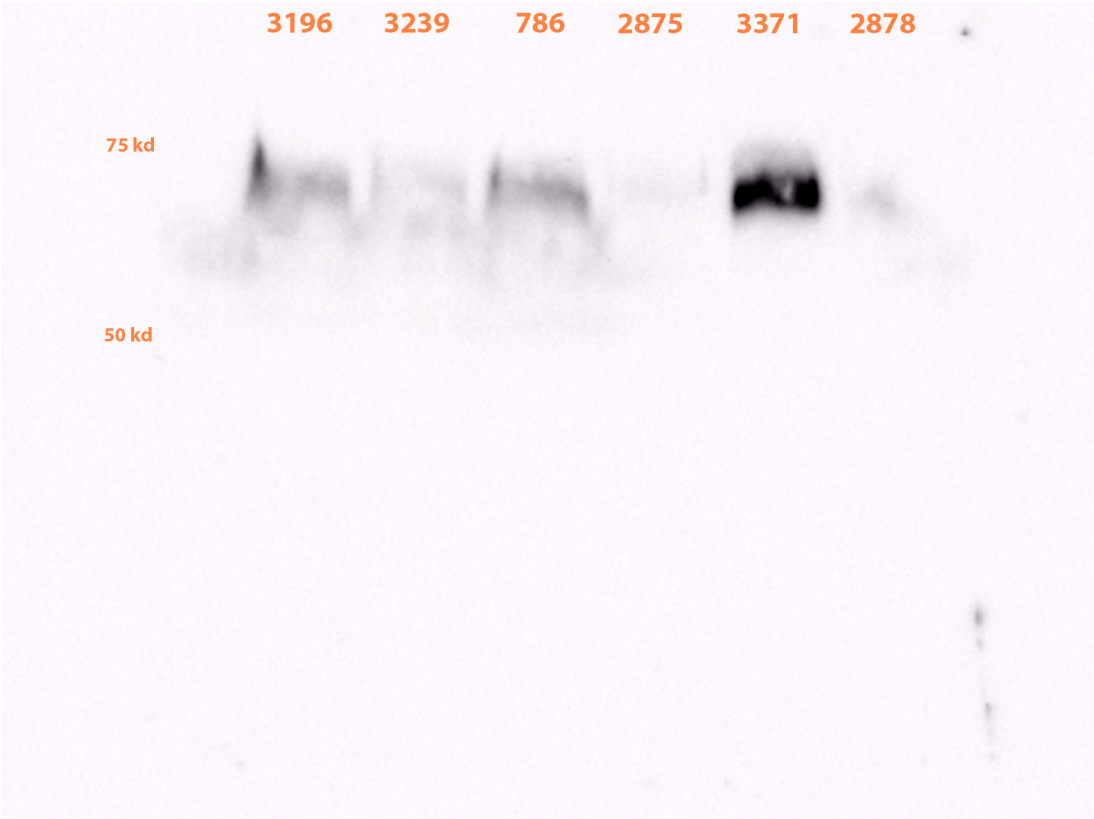

$\beta$ -actin

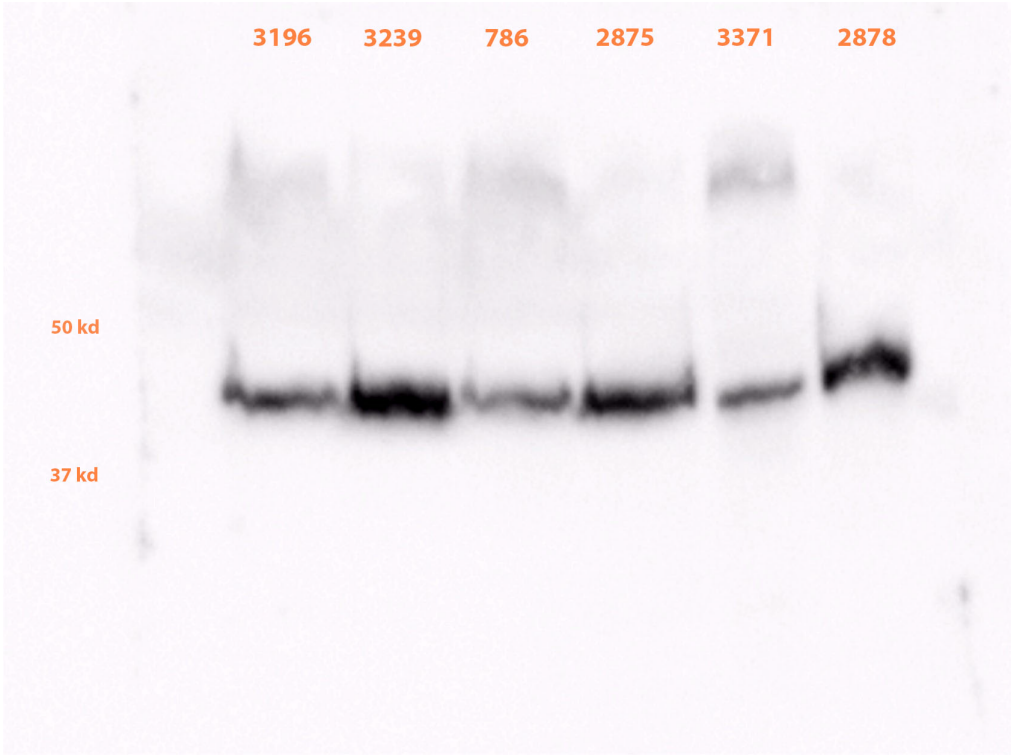

Supplement: inline-supplementary-material-2 [file inline-supplementary-material-2.pdf]
